# Supplementary material for: Hispolon Cyclodextrin Complexes and Their Inclusion in Liposomes for Enhanced Delivery in Melanoma Cell Lines
Source: MDPI journal article supplement (doi:10.3390/ijms232214487), 2022-11-21

### Supplementary Information

Figure S1. Calibration curve of Hispolon standard solutions ranging from (2  $\mu\text{g/ml}$ -100  $\mu\text{g/ml}$ ).

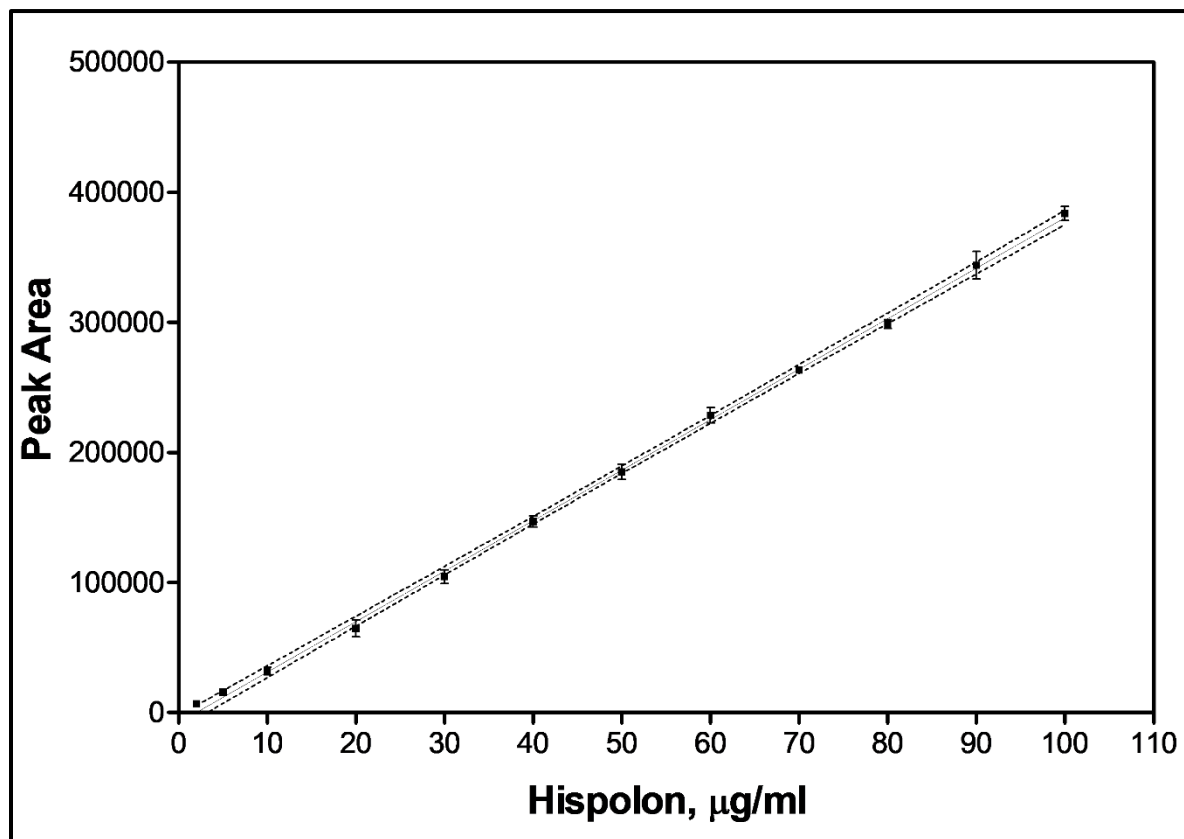

Figure S2. Representative Chromatogram of a Hispolone Standard Solution(100  $\mu\text{g/ml}$ ).

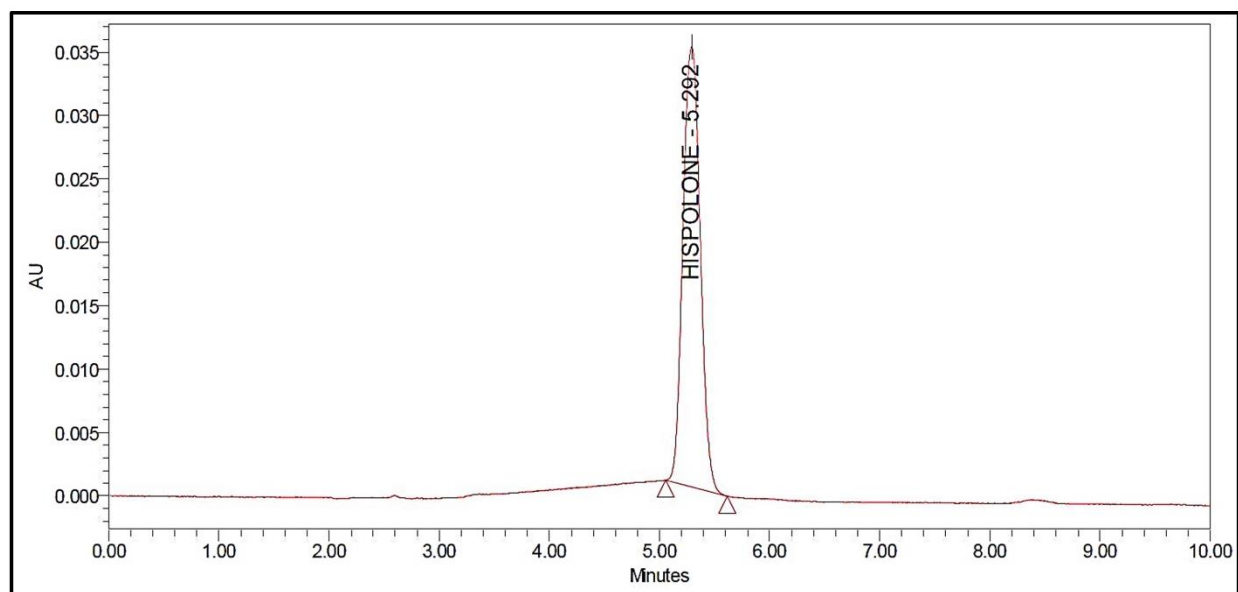

Figure S3. Job's continuous variation plot of Hispolon-SBE $\beta$ CD (HSC) complex. Data represented as mean  $\pm$  SEM (n=3).

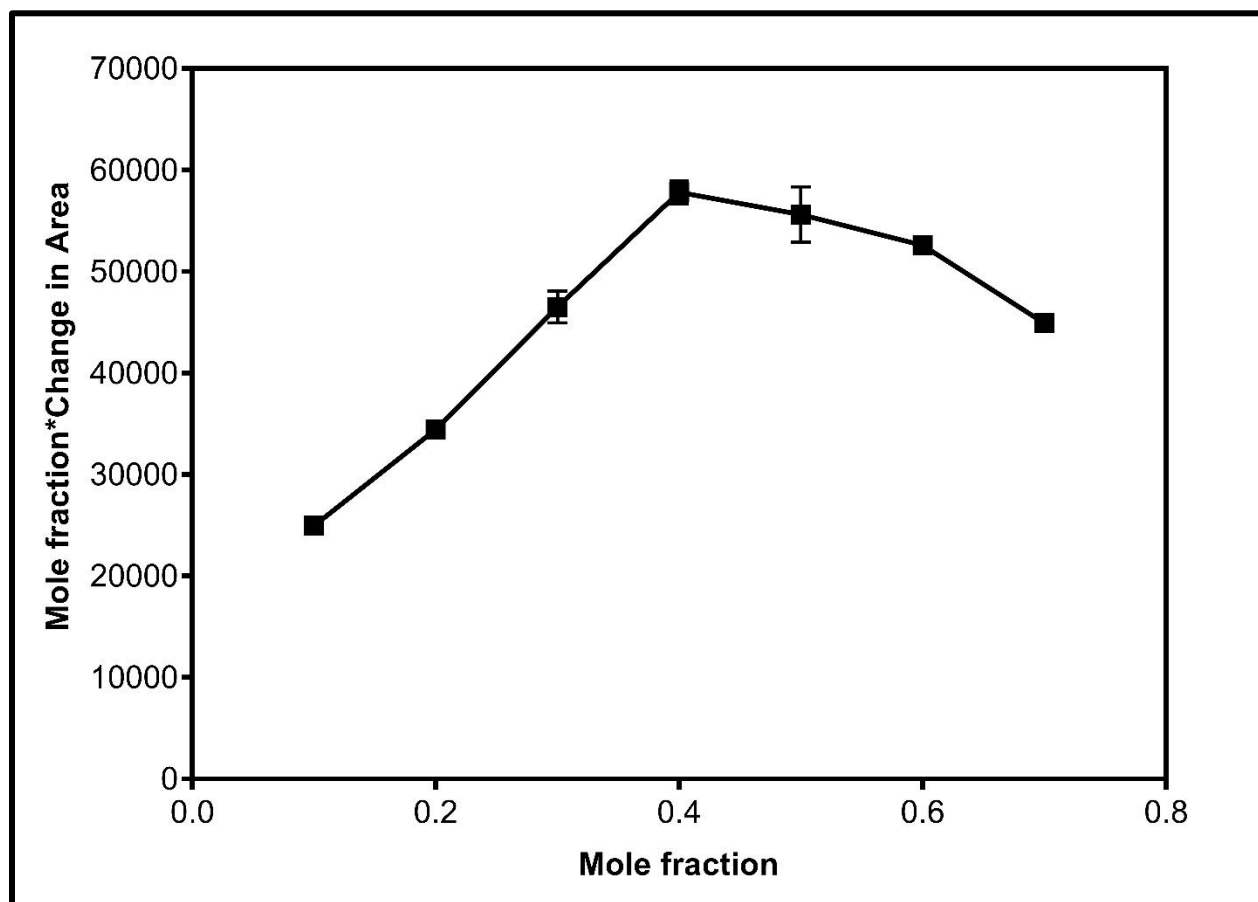

Supplement: s1 [file s1]
